# Unifying framework for the diffusion of microscopic particles in mucus

Antonio Cobarrubia<sup>1,2</sup>, Jarod Tall<sup>1,2</sup>, Austin Crispin-Smith<sup>1,2</sup>, and Antoni Luque<sup>2,3,4</sup>

<sup>1</sup>*Department of Physics, San Diego State University, San Diego, CA 92182*

<sup>2</sup>*Viral Information Institute, San Diego State University, San Diego, CA 92182*

<sup>3</sup>*Department of Mathematics and Statistics, San Diego State University, San Diego, CA 92182*

<sup>4</sup>*Computational Science Research Center, San Diego State University, San Diego, CA 92182*

## Abstract

Mucus is a fluid that protects animals against pathogens while promoting interactions with commensal microbes. Changes in the diffusivity of particles in mucus alter viruses' infectivity, the efficiency of bacterial pathogens to invade a host, and the effectivity of drug delivery. Multiple physicochemical properties modulate the diffusion of microscopic particles in mucus, but their combined effect is unclear. Here, we analyzed the impact of particle size, charge, chemistry, anomalous diffusion exponent, and mucus composition in the diffusivity of particles from 106 published experiments. We used a time window sampling of one second to define a consistent, effective diffusion across experiments. The effective diffusion spanned seven orders of magnitude from  $10^{-5}$  to  $10^2 \mu\text{m}^2/\text{s}$ . The anomalous exponent was the strongest predictor among all variables tested. It displayed an exponential relationship with the effective diffusion that explained 90% of the empirical data variance. We showed that the relationship and dominance of the anomalous diffusion exponent resulted from a general mathematical relationship obtained from first-principles for any subdiffusion mechanism. Our derivation demonstrated that the generalized diffusion coefficient is not a measurable physical quantity and must be replaced by the length and time scales associated with the underlying mobility mechanisms. This led us to a fundamental reformulation of the classic subdiffusion equation, which calls for a reinterpretation of anomalous diffusion in physical systems. We also discussed how our results impact the characterization of microscopic particle diffusion in mucus and other hydrogels.

Mucus is a complex fluid secreted by animals. It protects organs against the invasion of pathogens and promotes the interaction with commensal microbes (Bäckhed et al. 2005; Bakshani et al. 2018; Silveira and Rohwer 2016). Mucins—a characteristic component of mucus—are glycoproteins that form a polymeric mesh in mucus (Spagnolie 2015). Changes in the mucin network alter the diffusion of microscopic particles in mucus with disparate outcomes for the animal host. Low pH thickens mucus, reducing, for example, the diffusion and infection rate of viruses like HIV (Lai et al. 2009). Interaction with mucins also alters the diffusivity of particles in mucus. Commensal viruses that infect bacteria and reside in the gut, for instance, display immunoglobulin-like domains that are attracted to mucins, which reduces their diffusivity and increase their infectivity against bacteria (Barr et al. 2013, 2015). The regulation of particle diffusion in mucus is thus paramount for animal health, and the enhancement of diffusivity is also key for the delivery of medical drugs in the body (Cone 2009). The combined effect of these different physicochemical factors, however, remains puzzling.

42 Small biomolecules and biomolecular complexes tend to diffuse more readily through mucus,  
43 while larger particles are caught in the mucin network (Amsden and Turner 1999; Cone 2009). On  
44 the other hand, non-adhesive polystyrene particles with a diameter of 500 nm diffuse faster than  
45 smaller particles (200 nm) of the same type (Lai et al. 2007). Therefore, parameters other than  
46 particle size must play a role. Neutrally charged particles, for instance, display higher diffusivity  
47 than negatively and positively charged particles of the same size in mucus with a net negative  
48 charge (Abdulkarim et al. 2015; Arends et al. 2013; Hansing et al. 2016; Lieleg et al. 2010; Li et al.  
49 2013). Increase of salt concentration shields charged particles, leading to diffusivities similar to  
50 neutrally charged particles (Arends et al. 2013; Lieleg et al. 2010; Hansing et al. 2016). Instead,  
51 low pH increases the distribution of negative charges in mucins altering the electrostatics as well  
52 as viscoelasticity of mucus, reducing diffusivity for most particles (Celli et al. 2009; Lai et al. 2009;  
53 Lieleg et al. 2010; Spagnolie 2015; Suk et al. 2011). Each of these studies show how different  
54 physical properties can control the diffusion of microscopic particles in mucus, but the emerging  
55 picture is complex, and it is unclear if any of these physical factors is more dominant than others.

To assess the combined impact of each factor, we studied twenty-three published articles measuring the diffusion of particles in mucus or mucus-like hydrogels. Ten studies contained diffusion data that could be compared at the same time scale for spherical nanoparticles (Abdulkarim et al. 2015; Barr et al. 2015; Lai et al. 2007, 2009; Lieleg et al. 2010; Olmsted et al. 2001; Newby et al. 2017; S.Schuster et al. 2013; Suk et al. 2011; Yildiz et al. 2015). Using WebPlotDigitizer (Rohatgi 2019), we extracted 106 measurements of effective diffusion, measured at a window time of one second, that is,

$$D_{eff} = \frac{\langle MSD \rangle}{2k \Delta t_{eff}} . \quad (1)$$

Here  $\langle MSD \rangle$  was the ensemble mean squared displacement for each particle tracking experiment,  $k$  was the dimensions of the particle diffusivity, and  $\Delta t_{eff} = 1$  sec was the effective sampling time window (Huang et al. 2013). In all measurements, we estimated particle hydrodynamic diameter, particle type, mucus source, dominant mucin expression, and temperature. When possible, we extracted or derived the anomalous diffusion exponent ( $\alpha$ ), particle charge, mucus pH, mucus salt concentration, and mucin concentration. The anomalous exponent was obtained from the classic subdiffusion equation:

$$\langle MSD(\Delta t) \rangle = 2k D_{\alpha} \Delta t^{\alpha} , \quad (2)$$

56 Here  $D_{\alpha}$  is the generalized diffusion constant and  $\Delta t$  is the sampling time window (Metzler et al.  
57 2014).

58 Table 1 displays the ranges obtained for each physical parameter, and Table S.1 contains the  
59 full data set. The effective diffusions spanned seven orders of magnitude, from  $\sim 10^{-2}$   $\mu\text{m}^2/\text{s}$  to

60  $10^5 \mu\text{m}^2/\text{s}$ . Particle diameter ( $d$ ) spanned three orders of magnitude, from 1 nm to 1,300 nm;  
61 three quarters of the particles ( $n=80$ , 75%) had diameters greater than 100 nm. The anomalous  
62 exponent ( $\alpha$ ) ranged from strongly subdiffusive ( $\alpha \approx 0.1$ ) to purely diffusive ( $\alpha \approx 1$ ), but it was  
63 obtained only for a third of the dataset ( $n = 33$ , 30%). The zeta potential ( $\zeta$ ) measured the  
64 effective surface charge of particles in solution (Kumar and Dixit 2017). The values ranged from  
65  $-70$  mV to  $+40$  mV and were obtained for half of the dataset ( $n = 57$ , 52%). The temperature  
66 ranged was narrow, 295 K to 310 K. The pH ranged from mildly acidic (pH = 3.0) to slightly  
67 alkaline (pH = 7.4). Mucus experiments were associated to cell lines from four sources: human  
68 respiratory, human cervix, pig gastric, pig intestines. The dominant mucins were MUC5B, MUC2,  
69 and MUC5C. A third of the experiments were conducted in artificial mucus-like hydrogels.

70 The non-parametric statistical method random forest was applied to identify the most relevant  
71 variables impacting the effective diffusion. The variables pH, mucus concentration, salt concen-  
72 tration, and MUC5B were omitted because they were missing for most data in the multivariate  
73 analysis. The selection of variables was obtained in two rounds, discarding not statistically sig-  
74 nificant variables (p-value  $> 0.05$ ) in each round. This led to five significant variables (Figure 1).  
75 The anomalous diffusion exponent ( $\alpha$ ) was the most dominant variable with an average percentage  
76 increase in mean square error (%MSE) of  $22.4(\pm 3.2)\%$  (S.D.) (p-value = 0.0099). The second  
77 most dominant variable was particle type, followed by zeta potential, mucus source, and dominant  
78 mucin.

79 When analyzing the selected variables individually, the anomalous diffusion exponent displayed  
80 by far the strongest correlation with the effective diffusion (non-parametric Spearman correlation  
81  $\rho = 0.93$ ,  $p < 2.2\text{E-}16^{***}$ ,  $n = 39$ ). The effective diffusion increased exponentially with the  
82 anomalous diffusion exponent (Figure 2a). The linear regression for the transformed data (log-  
83 linear) explained 89% of the variance (slope= $5.3 \pm 0.3$ , p-value  $< 2.0 \cdot 10^{-16}^{***}$ ,  $R^2 = 0.89$ ,  
84 least-squares method). The anomalous exponent, however, was only reported for  $\sim 37\%$  ( $n=33$ ) of  
85 the data, which included carboxylated, pegylated, and viral particles. An inverse statistical model  
86 was fitted to estimate the mean anomalous exponents as a function of the effective diffusions for  
87 the remaining 63% of the data, corresponding to amine, chitosan, antibodies, and proteins particles  
88 ( $n = 67$ ). Particles with effective diffusions above  $D_{eff} > 10 \mu\text{m}^2/\text{s}$  were predicted to display  
89 regular diffusion ( $\alpha \sim 1$ ).

To elucidate the physical origin of the dominance of the anomalous exponent ( $\alpha$ ), its relationship  
with the effective diffusion,  $D_{eff}$ , was derived from Eqs. (1) and (2):

$$D_{eff} = \frac{D_{\alpha}}{\Delta t_{eff}} \Delta t_{eff}^{\alpha} . \quad (3)$$

90 The effective diffusion, thus, has a factor that varies exponentially with the anomalous exponent  
91 ( $\alpha$ ). However, it also depends on the generalized diffusion ( $D_\alpha$ ), which is implicitly a function of  
92 the anomalous diffusion exponent as well as particle and fluid properties, and its functional form  
93 changes depending on the specific underlying subdiffusion mechanism (Metzler et al. 2014; Joiner  
94 et al. 2019). Our meta-analysis contained a broad range of data (Table 1), including particles with  
95 different chemistry, mucus of different types, different physicochemical conditions, and independent  
96 groups carrying different experimental implementations. Therefore, it was not obvious how the  
97 generalized diffusion would be changing in each case, and Eq. (3) was not sufficient to justify the  
98 dependence and dominance of  $\alpha$  in determining the mobility of particles in mucus. To understand  
99 this phenomenon, the generalized diffusion had to be analyzed further.

100 The units of the generalized diffusion constant,  $D_\alpha$ , depend on the anomalous exponent. In our  
101 study, these units were  $\mu m^2/s^\alpha$ . The anomalous diffusion exponent, as any other physical quantity,  
102 has an associated uncertainty (error or standard deviation) (Taylor 1997). Thus, the units of  $D_\alpha$   
103 are uncertain. In other words, the generalized diffusion constant is not measurable. The fact that  
104  $D_\alpha$  is not a physical quantity has been previously overlooked and mandates a revision of the classic  
105 subdiffusion equation, Eq. (2).

To reformulate the subdiffusion equation, we split the generalized diffusion into the charac-  
teristic length scale ( $L_D$ ) and characteristic time scale ( $t_D$ ) associated to the physical mechanism  
responsible for the mobility of the particle:

$$D_\alpha = \frac{L_D^2}{t_D^\alpha} . \quad (4)$$

This ansatz was combined with the classic subdiffusion equation, Eq. (2), obtaining:

$$\langle MSD(\Delta t) \rangle = 2kL_D^2 \left( \frac{\Delta t}{t_D} \right)^\alpha . \quad (5)$$

106 This reformulated subdiffusion equation is valid for window times larger than the characteristic  
107 mobility time scale,  $\Delta t \geq t_D$ . For smaller window times, the underlying mobility mechanism will  
108 dominate, requiring a different formulation for the displacement (Joiner et al. 2019).

The reformulated subdiffusion equation, Eq. (5), was combined with the definition of the effec-  
tive diffusion, Eq. (1), obtaining

$$D_{eff}(\alpha) = \frac{L_D^2}{\Delta t_{eff}} \left( \frac{\Delta t_{eff}}{t_D} \right)^\alpha . \quad (6)$$

The effective diffusion, thus, depends exponentially on the anomalous diffusion exponent,  $\alpha$ , explaining the relationship observed empirically for the effective diffusion of particles in mucus (Figure

2). To investigate the origin of the dominance of the anomalous diffusion exponent in the variation of the effective diffusion across multiple scales, we investigated the logarithm of the effective diffusion equation, Eq. (3):

$$\log D_{eff}(\alpha) = \log \frac{L_D^2}{\Delta t_{eff}} + \alpha \log \frac{\Delta t_{eff}}{t_D} . \quad (7)$$

109 For a fix time window,  $\Delta t_{eff}$ , the change of the effective diffusion with respect the anoma-  
110 lous diffusion is  $\partial \log D_{eff} / \partial \alpha = \log(\Delta t_{eff} / t_D)$ , while the the impact of the change in the  
111 characteristic mobility length and time scales are, respectively,  $\partial \log D_{eff} / \partial \log L_D = 2$  and  
112  $\partial \log D_{eff} / \partial \log t_D = -\alpha$ . The changes were evaluated with respect the logarithms of the length  
113 and time scales to obtain results independent of the measuring units. The change with respect  
114 the length scale is constant with a value of two, while the change with resepect the time scale is  
115 bounded within an absolute value of one. Thus, for sampling time windows that are more than  
116 two orders of magnitude larger than the characteristic mobility time scale,  $\Delta t_{eff} / t_D \gg 10^2$ , the  
117 anomalous diffusion would be the dominant physical factor determining the change in the effective  
118 diffusion.

119 This hypothesis was confirmed for the collected diffusion data in mucus, Eq. (7), by extracting  
120 the average mobility length and time scales from the empirical data (Figure 2a). This led to  $L_D \sim 3$   
121 nm and  $T \sim 5 \mu\text{s}$ . The sampling window time was  $\Delta t_{eff} = 1$  s. Therefore,  $\Delta t_{eff} / t_D \sim 10^6 \gg 10^2$ ,  
122 satisfying the condition for the dominance of the anomalous diffusion exponent derived above. To  
123 justify the values obtained for the average length,  $L_D$  and time scales  $t_D$ , it was necessary to  
124 look into the underlying mechanisms fueling the mobility of the particles. A given mechanism  
125 would propel the particles with a velocity  $v_D$  for the characteristic time  $t_D$ . This defines the  
126 characteristic length scale  $L_D \sim v_D t_D$ . In all experiments analyzed, the particles were passive,  
127 acquiring a transient velocity fueled by the transfer of kinetic energy from the thermal buffeting  
128 of the fluid, that is,  $v_D^2 \sim k_B T / m$ , where  $k_B$  is the Boltzmann constant, and  $m$  is the mass of  
129 the particle. Mucus is a viscous fluid, and this velocity will dissipate with a characteristic time  
130  $t_D \sim m / \gamma$ , where  $\gamma$  is the friction coefficient. Not surprisingly, this leads to the Stokes-Einstein  
131 equation for the underlying characteristic diffusion,  $D \sim L_D^2 / t_D \sim k_B T / \gamma$ . For the typical mid-size  
132 particle in the data analyzed,  $d \sim 100$  nm, the relaxation time is  $t_D \sim 1 \mu\text{s}$  and the microscopic  
133 diffusion is  $D \sim 1 \mu\text{m}^2/\text{s}$ . This leads to the characteristic mobility length scale  $L_D \sim \sqrt{D t_D} \sim 1$   
134 nm (Joiner et al. 2019). Therefore, the estimated values for  $L_D$  and  $t_D$  are consistent with the  
135 average empirical values obtained for Eq. (7), supporting our reformulated subdiffusion framework.

136 Thus, the problem of characterizing the diffusion of a particle in mucus reduces to identifying  
137 the physical factors that regulating the anomalous exponent. These factors depend on the specific

138 mechanism hindering the regular diffusion (Metzler et al. 2014). There are at least two mechanism  
139 that may play an important role in mucus. First, microscopic particles can bind to the mucin  
140 fibers that constitute mucus leading to subdiffusion (Barr et al. 2015). Second, mucin fibers form  
141 a polymeric mesh that can trap particles as observed in other hydrogels (Wong et al. 2004). Below  
142 we discuss the physical factors that control the subdiffusion exponent in each case.

Binding to mucins in mucus does not necessarily lead to subdiffusion. If a particle has a single binding site with a characteristic binding time  $t_b$ , this will elongate the characteristic diffusion time,  $t_D \sim t_r + t_b$  leading to the microscopic diffusion  $D v_D^2 t_r^2 / t_D \sim f_r k_B T / m$ . Therefore, the diffusion will be rescaled by the fraction of time spent in the relaxation of the thermal energy,  $f_r = t_r / (t_r + t_b)$ , without altering the anomalous exponent. However, if more than one region of the particle can bind to mucins simultaneously and the number of number of regions bound to mucins vary stochastically, an increase of the binding time beyond the sampling time,  $t_b \gg \Delta t_{eff}$ , would lead to an effective power law distribution of binding times with no apparent characteristic binding time Xu et al. 2011. The emergence of long-tailed attachment time distributions leads to subdiffusion. The anomalous exponent,  $\alpha$ , is equal to the exponent,  $\nu$ , of the asymptotic approximated power-law distribution of attachment times (Metzler et al. 2014; Joiner et al. 2019). The generalized subdiffusion constant is given by

$$D_\alpha = \frac{D \tau_D}{\tau_D^\alpha} . \quad (8)$$

This was obtained using a continuous-time random walk approximation (Joiner et al. 2019). Here,  $D$  is the diffusion of the particle in the absence of interactions with mucins,  $\tau_D$  is the average diffusion time of a particle before attaching again to a mucin fiber. This result is consistent with the ansatz that we introduced in Eq. (4). The anomalous exponent can also be related to the average minimum time of a particle attached to a mucin fiber ( $\tau_0$ ):

$$\text{sinc}^{1/\alpha} \alpha = \frac{\tau_0}{\tau_D} . \quad (9)$$

143 This mechanism indicates that particle-mucin affinity will dominate the effective diffusion of a  
144 particle in mucus. Unfortunately, the experiments analyzed did not explore the particle affinities  
145 to mucus explicitly.

146 The microenvironment trapping mechanism was observed in F-actin networks, where micro-  
147 scopic tracers were shown to follow anomalous diffusion. The anomalous exponent was a lin-  
148 ear function of the ratio between the particle size ( $d$ ) and network's mesh size ( $\xi$ ) (Wong et al.  
149 2004). The empirical dependency obtained was  $\alpha \approx 1$  for  $d/\xi < 0.1$ ,  $\alpha \approx -1.25 d/\xi + 1.38$  for  
150  $0.1 < d/\xi < 1.1$ , and  $\alpha \approx 0.1$  for  $d/\xi > 1.1$ . Thus, particles with a size that is 10% of the

151 mesh size or smaller diffused normally, while particles with a size similar or larger to the mesh or  
152 displayed a reduced diffusivity with a low anomalous exponent. This phenomenon was justified  
153 qualitatively assuming an elastic energy threshold that is eventually large enough to overcome the  
154 free energy barrier and push the particle over a new microenvironment. The specific parameters  
155 of the relationship were not derived from first principles, but one would expect a similar behavior  
156 in mucus. This mechanism indicates that the effective diffusion of relatively large particles will  
157 be severely affected independently on particle-mucin interactions, that is, the particle chemistry.  
158 Unfortunately, the mesh size was not measured or reported in most experiments reviewed in our  
159 study.

160 Particle size was not an apparent significant predictor in the random forest analysis (Figure  
161 **1a**), but the subdiffusion mechanisms discussed above indicated that it should be relevant when  
162 approaching the typical mesh size of mucus. The analysis of the effective diffusion as a func-  
163 tion of particle diameters indicated a clear threshold around  $d^* \sim 100$  nm (Figure **3a**). Larger  
164 particles,  $d > 100$  nm, displayed lower effective diffusion values but with no apparent statistical  
165 correlation with size ( $\rho = -0.24$ ,  $p = 0.19$ ). The associated empirical and predicted anomalous  
166 exponents ranged from 0.15 to 1, indicating that factors other than particle size are influencing  
167 the subdiffusion. Smaller particles,  $d < 100$  nm, displayed an effective diffusion with a significant  
168 statistical correlation (Figure **3a**). In particular, those particles that had been predicted to display  
169 regular diffusion were inversely dependent with particle size, that is, slope  $m \sim -1$  (Figure **3**). As  
170 predicted by the microenvironment trapping mechanism, small particles in mucus displayed regu-  
171 lar diffusion, midsize particles were subject to subdiffusion (although the attachment-mechanism  
172 cannot be discarded), and large particles display a variety of outputs probably dependent on the  
173 mesh size (and potential interaction with mucus). The average mucus in humans has a typical  
174 mesh size between 100 to 1000 nm (Cone 2009), which explain the diffusion behavior for particles  
175 around 100 nm, or greater, in Figure **3b**.

176 Particle type was selected as the second most relevant variable to predict the effective diffusion  
177 based on the random Forest analysis (Figure **1**). Comparing the effective diffusion for the different  
178 particles confirms this prediction (Figure **S.1a**). Antibodies and proteins displayed the fastest  
179 effective diffusion with a mean of  $48.9 \mu\text{m}^2/\text{s}$  (Figure **S.1**). Viruses were the second fastest group  
180 with a mean effective diffusion an order of magnitude smaller,  $3.5 \mu\text{m}^2/\text{s}$ . Pegylated and amine  
181 particles formed the third group. They displayed statistically similar effective diffusions with means  
182 (medians)  $0.99 \mu\text{m}^2/\text{s}$  and  $2 \cdot 10^{-2} \mu\text{m}^2/\text{s}$ . This was followed by COOH particles, mean (median)  
183  $3 \cdot 10^{-2} \mu\text{m}^2/\text{s}$ , and finally chitosan  $4 \cdot 10^{-3} \mu\text{m}^2/\text{s}$ . Difference in particle size could explain the  
184 reduction in effective diffusion for antibodies/proteins, viruses, and PEG particles (Figure **S.1b**).  
185 They had, respectively, median sizes of  $\sim 10$  nm,  $\sim 100$  nm, and  $\sim 1000$  nm. It is unclear what



186 were the physico-chemical factors behind the slower diffusion of Amine, COOH, and Chitosan  
187 particles (Figure S.1).

188 The third predictor for effective diffusion was particle charge, express as the zeta-potential  
189 (Figure 1). Particles with negative zeta potential displayed a positive correlation with the effective  
190 diffusion constant with a Spearman correlation of  $\rho = 0.6$  ( $p = 0.002^{***}$ ,  $n = 36$ ) (Figure 4a). The  
191 relationship was approximated by an exponential function,  $D_{eff} \sim \exp(m\xi)$ . The potential rate,  
192  $m$ , was  $m = 0.024 \pm 0.006$  ( $p \sim 0.0002^{***}$ ) obtained from a least-square linear regression using  
193 the log-linear data. This exponential model accounted for 30 % of the variance ( $R^2 = 0.30$ ). The  
194 largest effective diffusions were achieved at neutral zeta potentials. Positive zeta potentials ( $n=21$ )  
195 had lower values but did not display a statistically significant correlation the effective diffusion.  
196 Particle size or other properties did not seem to explain the trend observed for negatively charged  
197 zeta potentials. These particles, however, displayed a linear positive correlation with the anomalous  
198 diffusion (Figure 4b). Based on the two mechanisms discussed above, one interpretation could be  
199 that given the negative charge of the mucin fibers, an increasing negative charge of a partice will  
200 increase its effective radius, increasing the particle size to network mesh ratio and thus reducing  
201 the diffusivity. Alternatively, the presence of negative charges could compete for ions with respect  
202 the mucin fibers exposing hydrophobic regions that could interact with the particles as has been  
203 observed in carboxylated particles forming bundles with mucus (Lai et al. 2007, 2009). Based on  
204 the attachment-mechanism, the increase in negative zeta potential would be proportional to the  
205 attachment time induced. The positive zeta potential would be expected to interact with mucin  
206 fibers. That could explain the reduction inf effective diffusion with respect neutral structures, but  
207 it did not display any apparent correlation with the anomalous exponent.

208 The mucus source and dominant mucin were the last two significant predictor of effective  
209 diffusion. The effective diffusion was faster in human cervix samples with a median  $\sim 10 \mu\text{m}^2/\text{s}$ ,  
210 although the values spanned six orders of magnitude, from  $\sim 10^{-4}$  to  $\sim 10^2 \mu\text{m}^2/\text{s}$  (Figure S.1a).  
211 The effective diffusion was the slowest in mucus from human lung (median  $\sim 10^{-2} \mu^2/\text{s}$ ) and  
212 pig intestine (median  $\sim 10^{-2} \mu\text{m}^2/\text{s}$ ). The median particle size in empirical data from human  
213 cervix mucus was more than an order of magnitude smaller,  $\sim 10 \text{ nm}$ , than for the empirical data  
214 from the other sources. The median pH for the empirical data from human cervix mucus was  
215 significantly lower pHs (median 5.5) compared to the other sources (median 7). Lower pH tends  
216 to thicken mucus (Hwang et al Rheological Properties of Mucus 1969), thus expecting a slower  
217 effective diffusion. But the particle size may have offset this trend. The transcription analysis  
218 identified MUC5B, which is dominant in human cervix, displaying the largest effective diffusion  
219 (median  $\sim 10 \mu\text{m}^2/\text{s}$ ) compared to the other dominant mucins, MUC2 common in respiratory  
220 mucus (median diffusion  $\sim 10^{-1} \mu\text{m}^2/\text{s}$ ), and MUC5AC common in intestinal mucus (median



221 diffusion  $\sim 10^{-2} \mu\text{m}^2/\text{s}$  (Figure S.3).

222 Thus, our meta-analysis discovered that the anomalous exponent is the dominant factor regu-  
223 lating the effective diffusion microscopic particles in mucus, explaining 90% of the variance across  
224 6 orders of magnitude (Figure 2a). However, less than 40% of the empirical data had measured  
225 the anomalous exponent, indicating an important gap in the field about the dominance of this  
226 factor in the diffusion of particles in mucus. To empirically validate our finding, we provide pre-  
227 dictions of the anomalous exponent in Figure 2b. Remarkably, those particles predicted to display  
228 regular diffusion showed an inverse dependence between the effective diffusion and particle size, as  
229 expected from standard Brownian motion (Figure 3).

230 Our first-principles analysis of subdiffusion provided a general equation that explained the  
231 exponential relationship between anomalous diffusion and the effective diffusion as well as the  
232 dominance of the anomalous exponent, independently of the underlying subdiffusion mechanism,  
233 Eq. (6). Our analysis indicated that the generalized diffusion constant is not a well-defined phys-  
234 ical quantity, and it must be replaced by characteristic length and time scales associated to the  
235 underlying mobility mechanisms, Eq. (4). This led to a reformulation of the subdiffusion equation,  
236 Eq. (5), which applies to any physical system. We conclude that the physical factors regulating  
237 the anomalous exponent is key to characterize and control the diffusivity of particles. In mucus  
238 and hydrogels, in particular, we propose that the attachment and microenvironment mechanisms  
239 should be used as a guide. Measuring the attachment time distributions and mucus mesh size  
240 are key factors regulating the anomalous exponent in these mechanisms. But they had not been  
241 measured even among the mucus experiments that measured anomalous exponents. Our work,  
242 thus, fills a gap that would guide a more effective and insightful study of effective diffusions in  
243 mucus and other complex fluids. Our study also mandates a reinterpretation of the generalized  
244 diffusion constant in any physical system.

245 —

## 246 References

247 Muthanna Abdulkarim, Nuria Agullo, Beatrice Cattoz, Peter Griffiths, Andreas Bernkop-Schnurch,  
248 Salvador Gomez Borros, and Mark Gumbleton. Nanoparticle diffusion within intestinal mucus:  
249 the impact of particle surface charge, size and heterogeneity across polyelectrolyte, pegylated and  
250 viral particles. *European Journal of Pharmaceutics and Biopharmaceutics*, 97:230–238, 2015.

251 Brian Amsden and Norma Turner. Diffusion Characteristics of Calcium. *Biothecnology and Bio-*  
252 *engineering*, 65(5):605–610, 1999.

- 253 Eric Archer. *rfPermute: Estimate Permutation p-Values for Random Forest Importance Metrics*,  
254 2019. R package version 2.1.7.
- 255 Fabienna Arends, Regina Baumgartel, and Oliver Lieleg. Ion-specific effects modulate the diffusive  
256 mobility of colloids in extracellular matrix gel. *Langmuir*, 29:15965–15973, 2013.
- 257 Fredrik Bäckhed, Ruth E. Ley, Justin L. Sonnenburg, Daniel A. Peterson, and Jeffrey I. Gordon.  
258 Host-Bacterial Mutualism in the Human Intestine. *Science*, 307(5717):1915–1920, 2005.
- 259 Cassie R. Bakshani, Ana L. Morales-Garcia, Mike Althaus, Matthew D. Wilcox, Jeffrey P. Pear-  
260 son, John C. Bythell, and J. Grant Burgess. Evolutionary conservation of the antimicrobial  
261 function of mucus: a first defence against infection. *Npj Biofilms and Microbiomes*, 4(1), 2018.
- 262 Jeremy J. Barr, Rita Auro, Mike Furlan, Katrine L. Whiteson, Marcella L. Erb, Joe Pogliano,  
263 Aleksandr Stotland, Roland Wolkowicz, Andrew S. Cutting, Kelly S. Doran, Peter Salamon,  
264 Merry Youle, and Forest Rohwer. Bacteriophage adhering to mucus provide a non-host-derived  
265 immunity. *PNAS*, 110(26):10771–10776, 2013.
- 266 Jeremy J. Barr, Rita Auro, Nicholas Sam-Soon, Sam Kassegne, Gregory Peters, Natasha Bonilla,  
267 Mark Hatay, Sarah Mourtada, Barbara Bailey, Merry Youle, Ben Felts, Arlette Baljon, Jim  
268 Nulton, Peter Salamon, and Forest Rohwer. Subdiffusive motion of bacteriophage in mucosal  
269 surfaces increases the frequency of bacterial encounters. *PNAS*, 112(44):13675–13680, 2015.
- 270 Jonathan P. Celli, Bradley S. Turner, Nezam H. Afdhal, Sarah Keates, Ionita Ghiran, Cia-  
271 ran P. Kelly, Randy H. Ewoldt, Gareth H. McKinley, Peter So, Shyamsunder Erramilli, and  
272 2 Rama Bansila. Helicobacter pylori moves through mucus by reducing the mucin viscoelastic-  
273 ity. *PNAS*, 106(34):14321–14326, 2009.
- 274 Richard A. Cone. Barrier properties of mucus. *Advanced Drug Delivery Reviews*, 61:75–85, 2009.
- 275 Johann Hansing, Catrin Ciemer, Won Kyu Kim, Xiaolu Zhang, Jason E. DeRouchey, and Roland R.  
276 Netz. Nanoparticle filtering in charged hydrogels: Effects of particle size, charge asymmetry and  
277 salt concentration. *European Physics Journal E*, 39(53), 2016. doi: <https://doi.org/10.1140/epje/i2016-16053-2>.
- 279 Feiran Huang, Erin Watson, Christopher Dempsey, and Junghae Suh. Real-Time Particle Tracking  
280 for Studying Intracellular Trafficking of Pharmaceutical Nanocarriers. *Methods Mol Biol.*, 991:  
281 211–223, 2013.
- 282 Chantal Hulo, Edouard De Castro, Patrick Masson, Lydie Bougueleret, Amos Bairoch, Ioannis Xe-  
283 narios, and Philippe Le Mercier. Viralzone: a knowledge resource to understand virus diversity.  
284 *Nucleic acids research*, 39(suppl\_1):D576–D582, 2011.

- 285 Kevin L. Joiner, Arlette Baljon, Jeremy Barr, Forest Rohwer, and Antoni Luque. Bacterial motility  
286 dominates bacteria-phage encounter rates in mucus. *Sci Rep*, 9, 2019. doi: <https://doi.org/10.1038/s41598-019-52794-2>.  
287
- 288 A. Kumar and C.K. Dixit. Methods for characterization of nanoparticles. In *Advances in*  
289 *nanomedicine for the delivery of therapeutic nucleic acids*, pages 43–58. Elsevier, 2017.
- 290 Samuel K. Lai, D.Elizabeth O’Hanlon, Suzanne Harrold, Ying-Ying Wang Stan Man, Richard  
291 Cone, and Justin Hanes. Rapid transport of large polymeric nanoparticles in fresh undiluted  
292 human mucus. *PNAS*, 104(5):1482–1487, 2007.
- 293 Samuel K. Lai, Kaoru Hida, Shetha Shukair, Ying-Ying Wang, Anna Figueiredo, Richard Cone,  
294 Thomas J. Hope, and Justin Hanes. Human immunodeficiency virus type 1 is trapped by acidic  
295 but not neutralized human cervicovaginal mucus. *J. Virol*, 83(21):11196–11200, 2009.
- 296 Leon D. Li, Thomas Crouzier, Aniruddh Sarkar, Laura Dunphy, Jongyoon Han, and Katharina  
297 Ribbeck. Spatial Configuration and Composition of Charge Modulates Transport into a Mucin  
298 Hydrogel Barrier. *Biophysical Journal*, 105:1357–1365, 2013.
- 299 Oliver Lieleg, Ioana Vladescu, and Katharina Ribbeck. “Characterization of particle translocation  
300 through mucin hydrogels. *Biophysical Journal*, 98:1782–1789, 2010.
- 301 Ralf Metzler, Jae-Hyung Jeon, Andrey G. Cherstvy, and Eli Barkai. Anomalous diffusion mod-  
302 els and their properties: non-stationarity, non-erodicity, and ageing at the centenary of single  
303 particle tracking. *Phys. Chem.*, 16(44):24128–24164, 2014.
- 304 Christina Cruickshank Miller. The Stokes-Einstein Law for Diffusion in Solution. *Proceedings of*  
305 *the Royal Society*, 106:724–729, 1924.
- 306 Jay Newby, Jennifer L. Schiller<sup>3</sup>, Timothy Wessler, Jasmine Edelstein, M. Gregory Forest, and  
307 Samuel K. Lai. A blueprint for robust crosslinking of mobile species in biogels with weakly  
308 adhesive molecular anchors. *Nature Communications*, 8(883):8–10, 2017.
- 309 Sophie Nguyen, Kristi Baker, Benjamin S. Padman, Ruzeen Patwa, Rhys A. Dunstan, Thomas A.  
310 Weston, Kyle Schollosser, Barbara Bailey, Trevor Lithgow, Michael Lazarou, Antoni Luque,  
311 Forest Rohwer, Richard S. Blumber, and Jeremy J. Barr. Bacteriophage Transcytosis Provides  
312 a Mechanism To Cross Epithelial Cell Layers. *mBio*, 8(6), 2017.
- 313 Stuart S. Olmsted, Janet L. Padgett, Ashley I. Yudin, Kevin J. Whaley, Thomas R. Moench,  
314 and Richard A. Cone. Diffusion of Macromolecules and Virus-Like Particles in Human Cervical  
315 Mucus. *Biophysical journal*, 81(21):1930–1937, 2001.

- 316 Ankit Rohatgi. Webplotdigitizer 4.2, 2019. URL <https://automeris.io/WebPlotDigitizer>.
- 317 Cynthia B. Silveira and Forest L. Rohwer. Piggyback-the-Winner in host-associated microbial  
318 communities. *Npj Biofilms and Microbiomes*, 2(1), 2016.
- 319 Saverio Spagnolie. *Complex fluids in biological systems experiment, theory and computation*.  
320 Springer Science Business Media, New York, 2015.
- 321 Benjamin S. Schuster, Jung Soo Suk, Graeme F. Woodworth, and Justin Hanes. Nanoparticle dif-  
322 fusion in respiratory mucus from humans without lung disease. *Biomaterials*, 34:3439–3446,  
323 2013.
- 324 Jung Soo Suk, Samuel K. Lai, Nicholas J. Boylan, Michelle R. Dawson, Michael P. Boyle, and Justin  
325 Hanes. Rapid transport of muco-intert nanoparticles in cystic fibrosis sputum treated with  
326 N-acetyl cysteine. *Nanomedicine*, 6:365–375, 2011.
- 327 J. Taylor. *Introduction to error analysis, the study of uncertainties in physical measurements*.  
328 University Science Books, New York, 1997.
- 329 Jiuling Wang, Yiwei Yang, Miaorong Yu, Guoqing Hu, Yong Gan, Huajian Gao, and Xinghua Shi.  
330 Diffusion of rod-like nanoparticles in non-adhesive and adhesive porous polymeric gels. *Journal*  
331 *of the Mechanics and Physics of Solids*, 112:431–457, 2018.
- 332 Timothy Wessler, Scott A. McKinley, Richard Cone, Gregory Forest, and Samuel K. Lai. Us-  
333 ing computational modeling to optimize the design of antibodies that trap viruses in mucus.  
334 *American Chemical Society: Infectious Diseases*, 2:82–92, 2016.
- 335 Jacob Witten and Katharina Ribbeck. The particle in the spider’s web: transport through biolog-  
336 ical hydrogels. *Nanoscale*, 9:8080–8095, 2017. URL [DOI:10.1039/C6NR09736G](https://doi.org/10.1039/C6NR09736G).
- 337 I. Y. Wong, M. L. Gardel, D. R. Reichman, Eric R. Weeks, M. T. Valentine, A. R. Bausch,  
338 and D. A. Weitz. Anomalous diffusion probes microstructure dynamics of entangled f-actin  
339 networks. *Phys. Rev. Lett.*, 92:178101, Apr 2004. doi: 10.1103/PhysRevLett.92.178101. URL  
340 <https://link.aps.org/doi/10.1103/PhysRevLett.92.178101>.
- 341 Q. Xu, L. Feng, R. Sha, N.C. Seeman, and P.M. Chaikin. Subdiffusion of a sticky particle on a  
342 surface. *Phys. Rev. Lett.*, 106(22):228102, 2011.
- 343 Hasan M. Yildiz, Craig A. McKelvey, Patrick J. Marsac, and Rebecca L. Carrier. Size selectivity  
344 of intestinal mucus to diffusing particulates is dependent on surface chemistry and exposure to  
345 lipids. *Journal of Drug Targeting*, 23(7-8), 2015. doi: [https://doi.org/10.3109/1061186X.2015.](https://doi.org/10.3109/1061186X.2015.1086359)  
346 1086359.

347 Daniel R Zerbino, Premanand Achuthan, Wasuu Akanni, M. Ridwan Amode, Daniel Barrell, Jyoth-  
348 ish Bhai, Konstantinos Billis, Carla Cummins, Astrid Gall, Carlos Garcia Giron, Laurent Gil,  
349 Leo Gordon, Leanne Haggerty, Erin Haskell, Thibaut Hourlier, Osagie G. Izuogu, Sophie H  
350 Janacek, Thomas Juettemann, Jimmy Kiang To nad Matthew R Laird, Ilias Lavidas, Zhicheng  
351 Liu, Jane E. Loveland, Thomas Maurel, William McLaren, Benjamin Moore, Jonathan Mudge,  
352 Daniel N Murphy, Victoria Newman, Michael Nuh, Denye Ogeh, Chuang Kee Ong, Anne Parker,  
353 Mateus Patricio, Harpreet Singh Riat, Helen Schuilenburg, Dan Sheppard, Helen Sparrow,  
354 Kieron Taylor, Anja Thormann, Alessandro Vullo, Brandon Walts, Amonida Zadissa, Adam  
355 Frankish, Sarah E. Hunt, Myrto Kostadima, Nicholas Langridge, Fergal J. Martin, Matthieu  
356 Muffato, Emily Perry, Magali Ruffier, Dan M. Staines, Stephen J. Trevanion, Bronwen L Aken,  
357 Fiona Cunningham, Andrew Yates, and Paul Flicek. Ensembl 2018. *Nucleic Acids Research*, 46:  
358 D754–D761, 2018. doi: <https://doi.org/10.1093/nar/gkx1098>.

359 **Figures and Tables**

| Property            | Symbol           | Range                                                              | Data points |
|---------------------|------------------|--------------------------------------------------------------------|-------------|
| Effective diffusion | $D_{\text{eff}}$ | $3.1 \cdot 10^{-5}$ to $1.3 \cdot 10^2 \mu\text{m}^2/\text{s}$     | 106         |
| Anomalous exponent  | $\alpha$         | 0.16 to 1.02                                                       | 39          |
| Diameter            | $d$              | 3.5 to 1280.0 nm                                                   | 106         |
| Zeta potential      | $\zeta$          | -73.0 to +33.3 mV                                                  | 57          |
| Temperature         | T                | 295 to 310 K                                                       | 106         |
| pH                  | pH               | 3.0 to 7.4                                                         | 63          |
| Mucus source        |                  | Hydrogel, human lung, human cervix,<br>pig stomach, pig intestines | 106         |
| Mucin type          |                  | MUC2, MUC5AC, MUC5B                                                | 103         |

Table 1: Summary of empirical data.  $D_{\text{eff}}$ : The effective diffusion was obtained for a common time window of 1 second. For references that shared relative diffusion with respect diffusion in water, the effective diffusion constant was scaled using the Stokes-Einstein equation using the temperature and hydrodynamic particle diameter reported (Miller 1924). Room temperature (298 K) was assumed if temperature was not reported in the study. Particle type data was obtained by classifying particles as COOH, PEG, virus, amine, antibody/protein, or chitosan. This was chose as a qualitative measure of particle-mucin bonds. The dominant mucin composition from each mucus source was obtained by evaluating the expression levels of mucin genes from the genome bioinformatics portal Ensembl (Zerbino et al. 2018). Mucins were identified assuming the tissue/organ associated with each mucus, or closely associated tissues. Expression levels were collected by taking the average of reported median of transcript per million (TPM) RNA-sequence and the most explicitly stated expression levels of low, medium, and high. Based on potential gene expression of mucins with reported levels of below cutoff, TPM measured below the minimum (0.05 TPM) is distinguished from experiments with no data due to possible gene expression. An expression level of low, medium or high was obtained over reports of below cutoff in the same tissue. The dominant mucin was determined by the highest expression level then, if necessary, by the highest average of median TPM. Identification of mucin expression based on tissues was associated with each mucus: human respiratory mucus and human cystic fibrosis mucus were associated with the human lung mucin genes; human cervical mucus and cervicovaginal mucus were associated with human cervix or uterus mucin genes; pig intestinal mucus was originally from jejunum part of the small intestine, however, due to a lack of reports for jejunum tissue, the associated mucin genes were taken as the average of the median of TPM of pig duodenum and pig ileum parts of the small intestine based on the close proximity to the jejunum; pig ileum intestinal mucus were associated with ileum tissue mucin genes; pig gastric mucus were collected from pig stomach mucin genes.

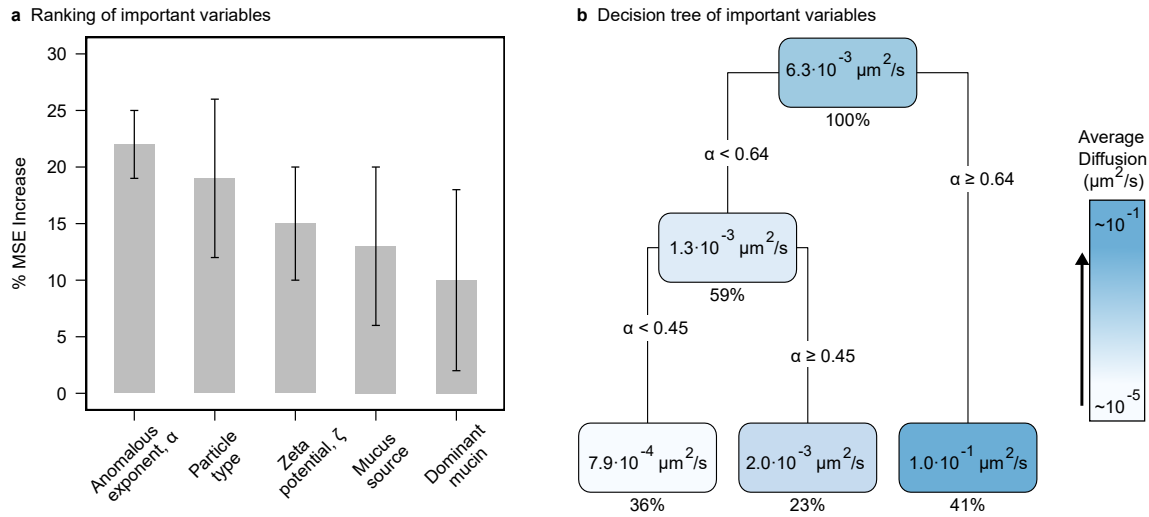

Figure 1: Selected variables impacting effective diffusion. **a**, Average percentage increase of mean-square error (% MSE) for the selected variables. These variables were investigated in permutations of three using random forest (R package rfPermute by Archer 2019). The error bars correspond to the standard deviation. **b**, Decision tree for the most important variables. Each node contains the predicted average  $D_{\text{eff}}$  and percentage of data predicted. The gradient display diffusion values from  $\sim 10^{-5} \mu\text{m}^2/\text{s}$  (white) to  $\sim 10^{-1} \mu\text{m}^2/\text{s}$  (blue).



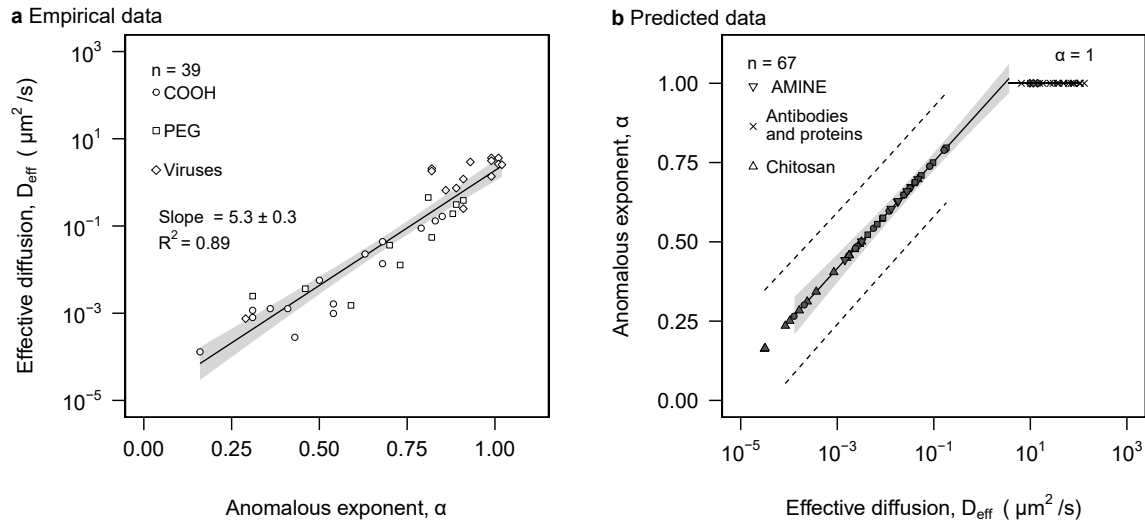

Figure 2: Effective diffusion and anomalous exponent analysis. **a**, effective diffusion was plotted as a function of anomalous exponent. The solid line represents the regression model. The grey area represents the 95% confidence interval. Statistically significant slope and  $R^2$  of linear regression is displayed. **b**, anomalous exponent was predicted based on the model found empirically in **a**. The solid line designates the predicted linear model. The grey area represents the 95% confidence interval of the predicted linear model. The dashed line represents a 95% prediction interval **a-b**, distinguished particle types are represented in the legend of both panels. .

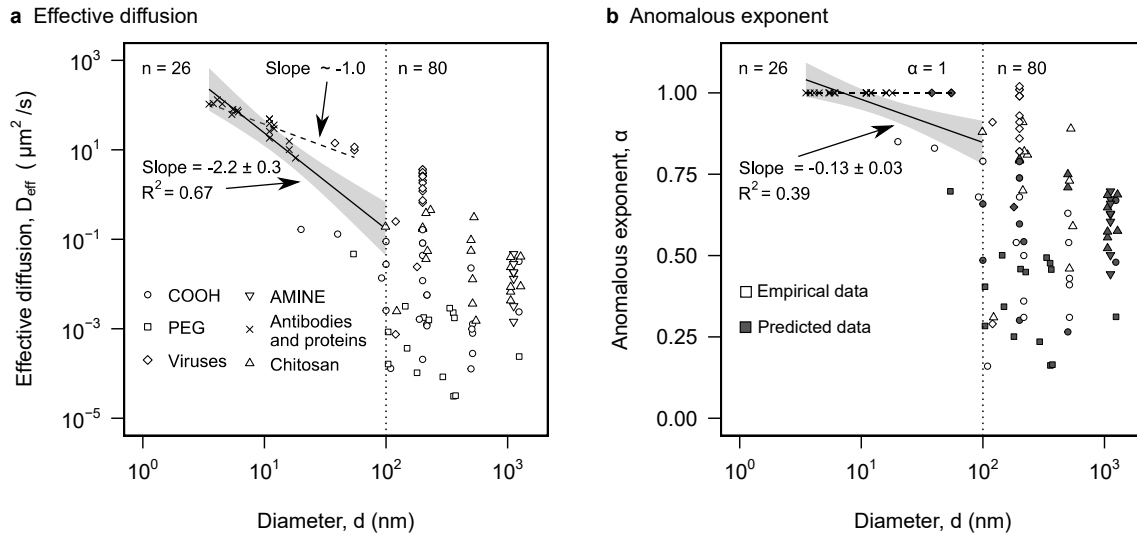

Figure 3: Particle size analysis. **a**, effective diffusion was plotted against particle size,  $d$ . **b**, anomalous exponent was plotted as a function of particle size. **a-b**, different particle types with different symbols are indicated in **a**'s legend. Separate analysis was conducted for particles smaller than 100 nm represented by the dotted line at  $d = 100$  nm. Solid line corresponds to significant linear regression and the grey area represents the 95% confidence interval. Significant slope and  $R^2$  of each linear regression are displayed.

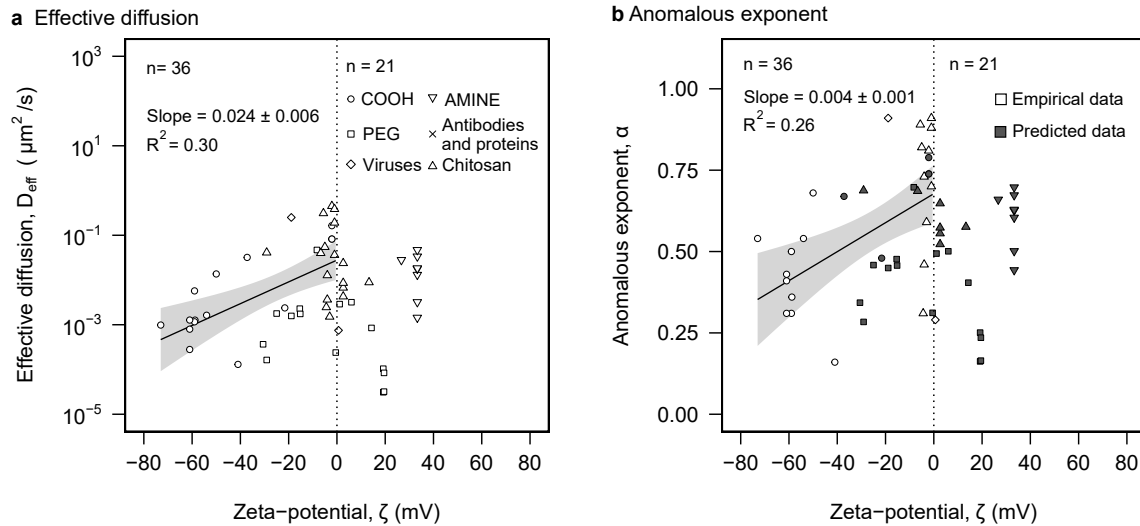

Figure 4: Electrostatic analysis. **a**, effective diffusion was plotted against zeta potential. **b**, anomalous exponent as a function of zeta potential. Classification of empirical and predicted data is represented in the legend. **a-b**, Different particle types are distinguished in **a** legend. Separate tests based on charge sign was conducted and designated by the dotted line at  $\zeta = 0$ . Solid line represents significant linear regression. Grey area represents the 95% confidence interval of the linear regression. Significant slope and  $R^2$  of each linear regression are displayed.

[Common\\_core.csv](#)

Table S.1: Supplementary material of common core file of all reviewed data. Common\_core. The first row is a header with designated column names fitted to physical properties collected. Particle name, particle type, zeta potential, particle size, effective diffusion constant at 1s, anomalous exponent, diffusion in water, ratio between effective diffusion constant at 1s and diffusion in water, temperature, pH, dosing medium, salt type used, salt concentration, mucus used in the experiment, mucus concentration, mucus purification, mucin gene expression level, and dominant mucin gene is denoted as Particle, Surface\_Chemistry, Zeta, Diameter, D\_w, Diffusion\_constant, alpha, Ratio\_Diffusion, Temperature, pH, Dosing\_Medium, Salt\_type, Salt\_Concentration, Mucus\_Type, Muc\_Con, Purification, 'mucin gene name'\_EL, and Dominate\_Mucin, respectively.

[Mucin\\_expression\\_level.csv](#)

Table S.2: Supplementary material on dominant mucin classification based on mucus source. Mucin\_expression\_level. The first row is a header and first column designates mucus type. Represented expression levels are denoted as 'mucin gene name'\_EL. Expression levels are classified as below cutoff, low, medium, high, or unavailable. The average median Transcripts per million (TPM) for each mucin gene is designated as 'mucin gene name'\_TPM\_median\_avg. See methods for more information.

| Dependent variable     | Independent variable | Slope             | Intercept       | $R^2$ | p-value          | rho‡ | p-value‡         |
|------------------------|----------------------|-------------------|-----------------|-------|------------------|------|------------------|
| Effective Diffusion¶^∧ | Diameter^∞           | $-2.1 \pm 0.3$    | $3.5 \pm 0.4$   | 0.67  | $3.5E-7^{***}$   | -0.9 | $1.7E-12^{***}$  |
| Effective Diffusion¶^∧ | Negative†            | $0.024 \pm 0.006$ | $-1.6 \pm 0.2$  | 0.30  | $0.0006^{***}$   | 0.6  | $0.0002^{***}$   |
| Effective Diffusion¶^∧ | Positive†            | $0.01 \pm 0.02$   | $-2.8 \pm 0.4$  | 0.03  | 0.5              | 0.3  | 0.2              |
| Effective Diffusion¶^∧ | Alpha                | $5.3 \pm 0.3$     | $-5.0 \pm 0.2$  | 0.89  | $<2.0E-16^{***}$ | 0.9  | $<2.2E-16^{***}$ |
| Anomalous Exponent     | Diameter^∞           | $-0.13 \pm 0.03$  | $1.11 \pm 0.04$ | 0.39  | $0.0007^{***}$   | -0.6 | 0.001            |
| Anomalous Exponent     | Negative†            | $0.004 \pm 0.001$ | $0.68 \pm 0.04$ | 0.26  | $0.002^{***}$    | 0.5  | $0.0007^{***}$   |
| Anomalous Exponent     | Positive†            | $0.003 \pm 0.003$ | $0.44 \pm 0.07$ | 0.04  | 0.4              | 0.3  | 0.2              |

Table S.3: Supplementary material of linear Analysis of Nanoparticles' Mobility Through Mucus and Biohydrogels. || Simple Linear Regression and Pearson's p-value for the slope. ‡ Spearman analysis. ¶ Effective Diffusion coefficient ( $\mu m^2/s$ ). ^∧ Logarithmic of base 10 ( $log_{10}$ ). ^∞ Diameter less than 100 nm. \*\*\* Data has strong significance. † Zeta potential (mV). Overview table of values associating with statistically significant simple linear regression along with spearson and pearson analysis.

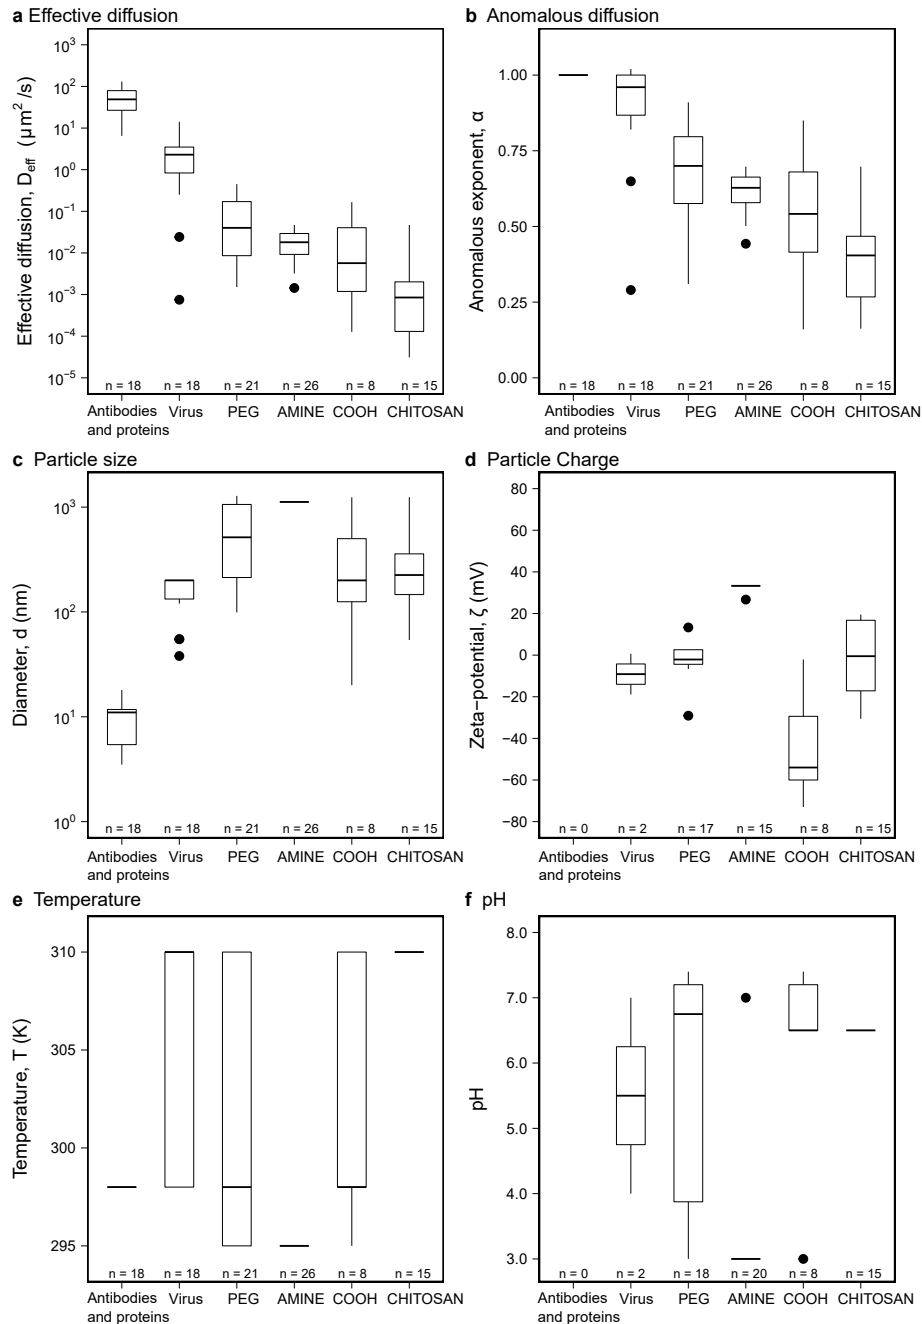

Figure S.1: Transport capabilities based on particle type. **a**, effective diffusion constant at one second based on particle type **b**, anomalous exponent based on particle type. **c**, particle size based on particle type. **d**, particle net charge based on particle type. **e**, mucus temperature based on particle type. **f**, mucus pH based on particle type. **a-f**, box plots are ranked by effective diffusion from high to low. The total amount of data points for each particle type is designated as n aligned with their respected particle type for each panel.



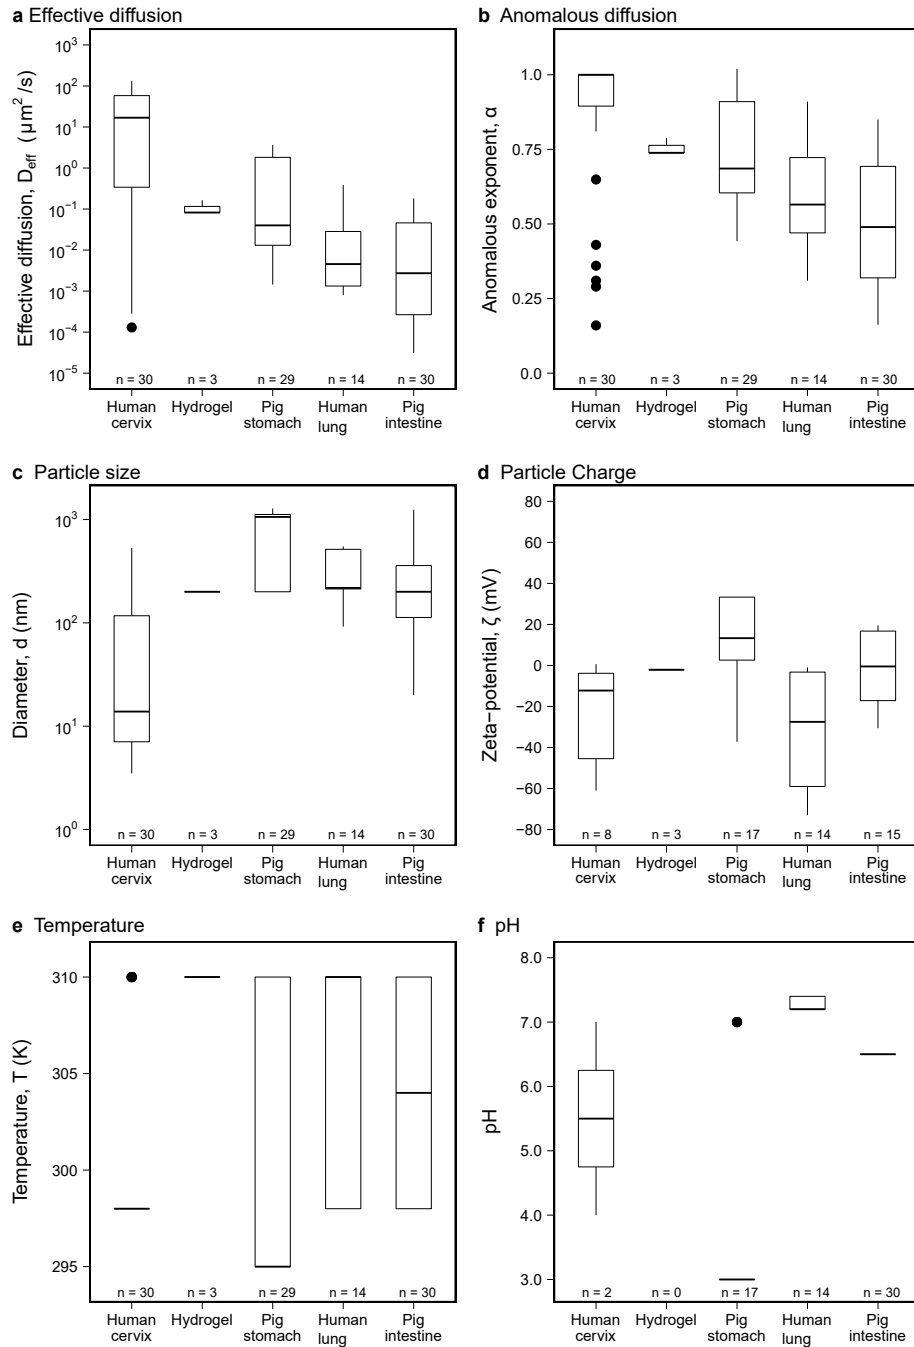

Figure S.2: Mucus source influence on particle transport. **a**, effective diffusion constant at one second based on mucus source. **b**, anomalous exponent based on mucus source. **c**, particle size based on mucus source. **d**, particle net charge based on mucus source. **e**, mucus temperature based on mucus source. **f**, mucus pH based on mucus source. **a-f**, box plots are ranked by effective diffusion from high to low. The total amount of data points for each mucus source is designated as  $n$  aligned with their respected mucus source for each panel.

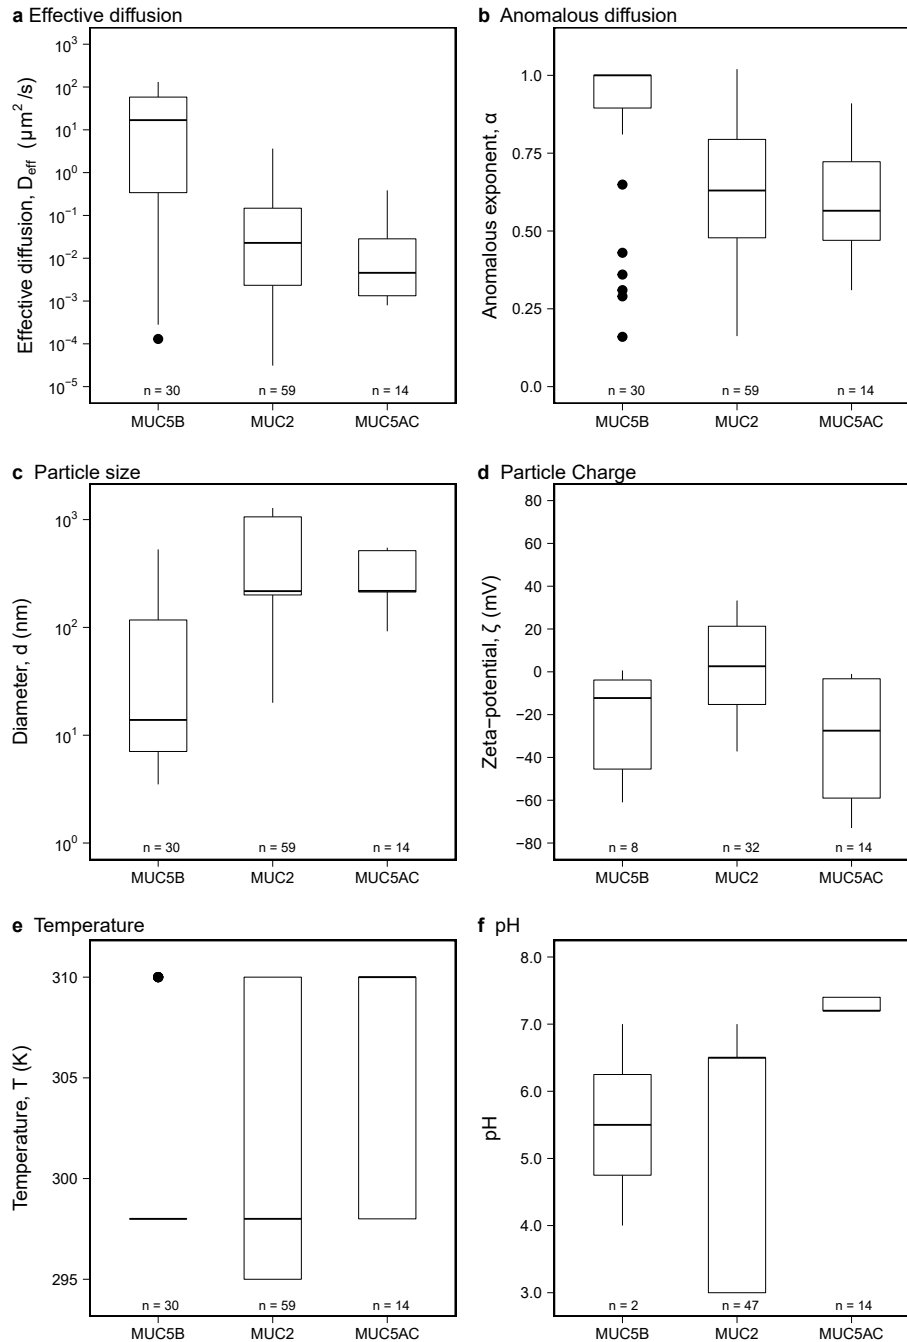

Figure S.3: Impact of dominant mucin genes on particle transport. **a**, effective diffusion constant at one second based on dominant mucin. **b**, anomalous exponent based on dominant mucin. **c**, particle size based on dominant mucin. **d**, particle net charge based on dominant mucin. **e**, mucus temperature based on dominant mucin. **f**, mucus pH based on dominant mucin. **a-f**, box plots are ranked by effective diffusion from high to low. The total amount of data points for each dominant mucin is designated as  $n$  aligned with their respective dominant mucin for each panel.

**a** Overview of the linear regression model for effective diffusion against anomalous exponent

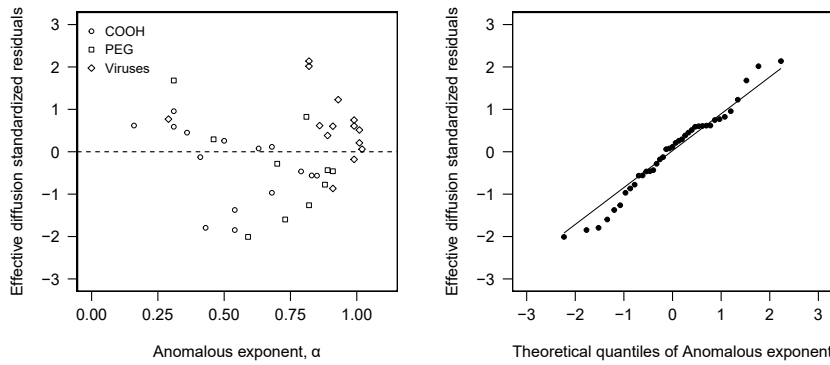

**b** Overview of the linear regression model for particle size smaller than 100 nm,  $d < 100$  nm

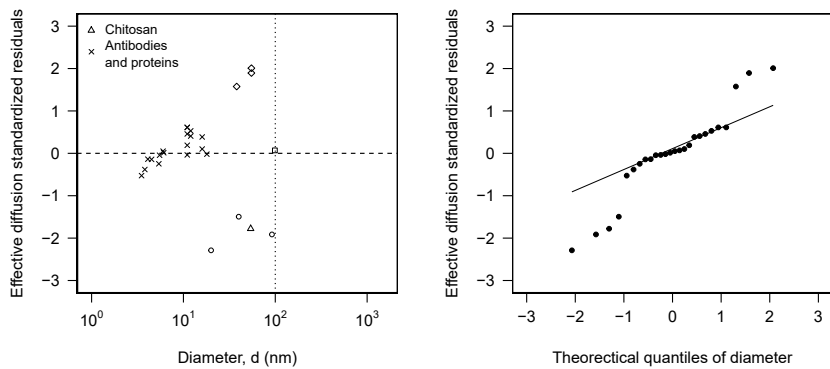

**c** Overview of the linear regression model for particles displaying normal brownian motion,  $\alpha = 1$

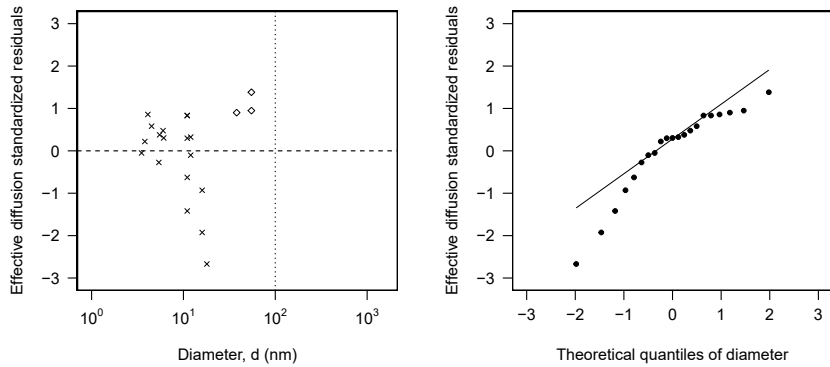

**d** Overview of the linear regression model for negative charged correlation

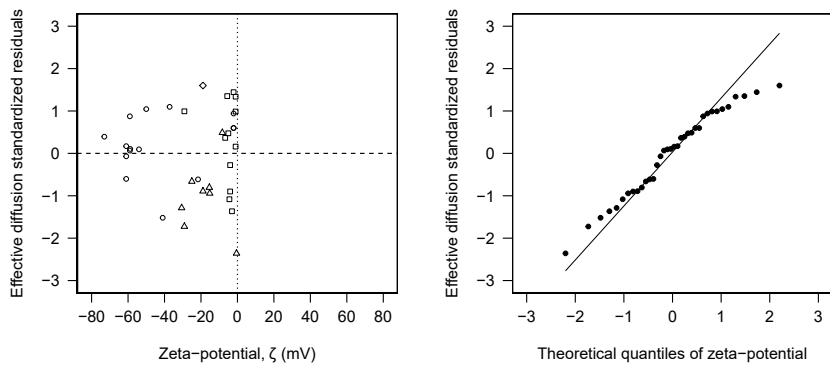

Figure S.4: In-depth overview of significant linear regression models. **a**, standardized residual and normal probability of standardized residuals for effective diffusion as a function of anomalous exponent. **b**, standardized residual and normal probability of standardized residuals for effective diffusion as a function of particle size for sizes less than 100 nm. Dotted line is a visualization marker for particles smaller than 100 nm. **c**, standardized residual and normal probability of standardized residuals for effective diffusion as a function of particle size for particles displaying normal brownian motion. Dotted line is a visualization marker for particles smaller than 100 nm. **d**, standardized residual and normal probability of standardized residuals for effective diffusion as a function of zet potential for negatively charged particles. Dotted line is a visualization marker for negatively charged particles. **a-d**, different particle types with corresponding symbols are designated in **a** and **b**'s legend.
